# Supplementary material
Source: Springer Nature journal article supplement (https://www.springermedizin.de/resource/supplementary/12889_2011_3892_MOESM3_ESM.pdf/9490818)

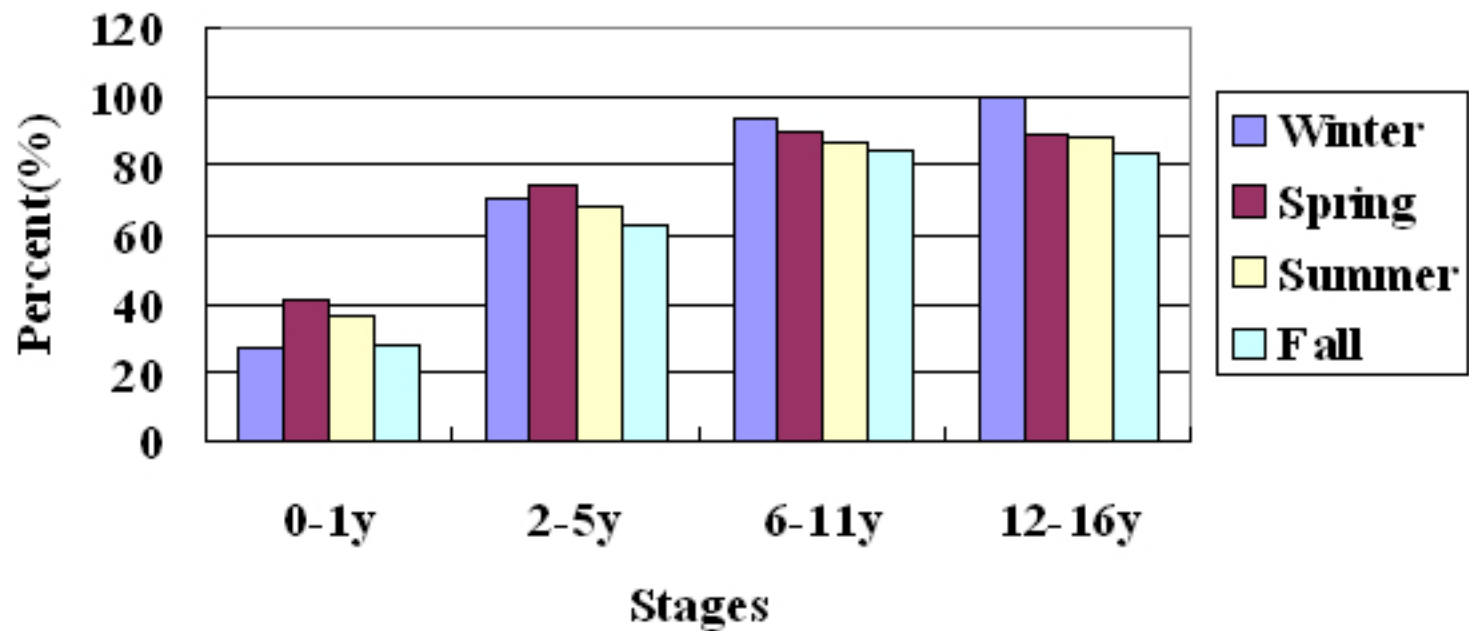

Supplement: MOESM3 [file 9490818]
